# Supplementary material for: Distinct seasonal changes and precession forcing of surface and subsurface temperatures in the mid-latitudinal North Atlantic during the onset of the Late Pliocene
Source: Copernicus journal article supplement (doi:10.5194/cp-20-2103-2024), 2024-09-23
Supplement: Supplementary file 1 [file cp-20-2103-2024-supplement.pdf]

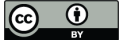

*Supplement of*

## **Distinct seasonal changes and precession forcing of surface and subsurface temperatures in the mid-latitude North Atlantic during the onset of the Late Pliocene**

**Xiaolei Pang et al.**

*Correspondence to:* Xiaolei Pang ([xiaolei.pang@pku.edu.cn](mailto:xiaolei.pang@pku.edu.cn))

The copyright of individual parts of the supplement might differ from the article licence.

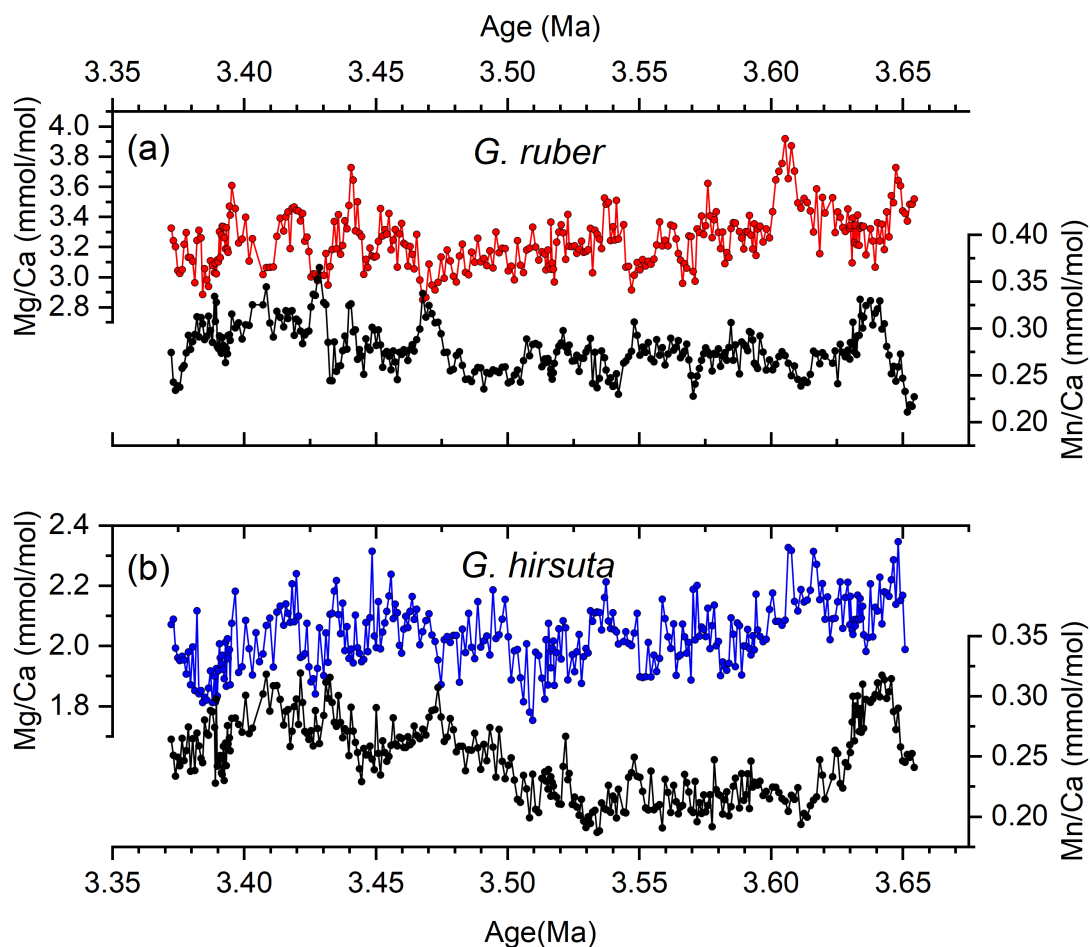

**Figure S1.** Site U1313 downcore Mg/Ca in comparison with Mn/Ca of species *G. ruber* white (a) and *G. hirsuta* (b). No corresponding anomalies were found.

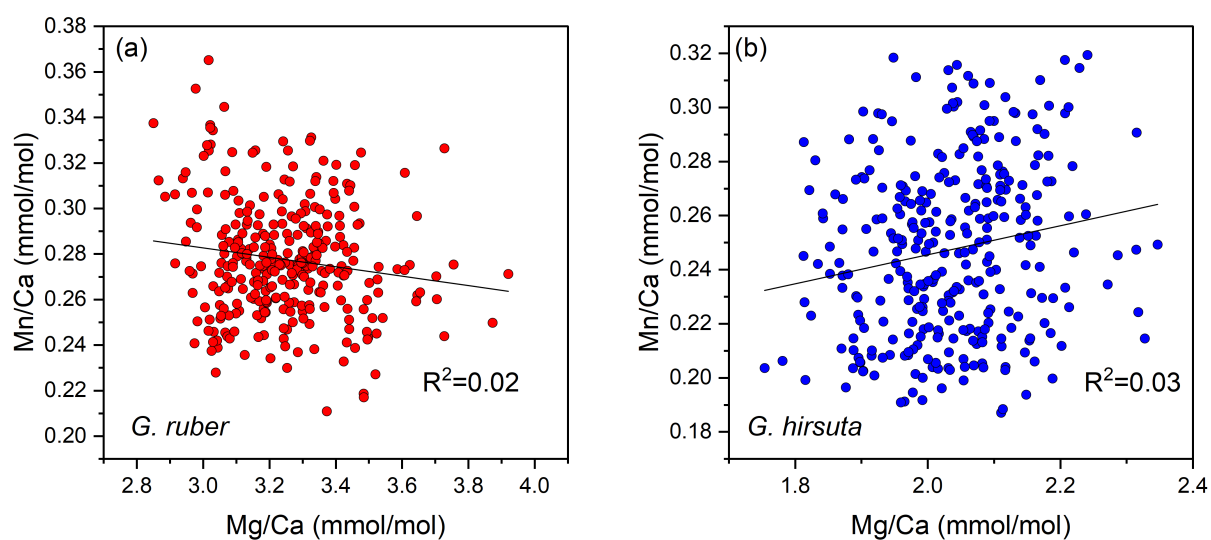

**Figure S2.** Scatter plots of Mg/Ca versus Mn/Ca for species *G. ruber* white (a) and *G. hirsuta* (b). Black line indicates the best linear fit, respectively. No significant relationship between Mg/Ca and Mn/Ca is observed for either species.

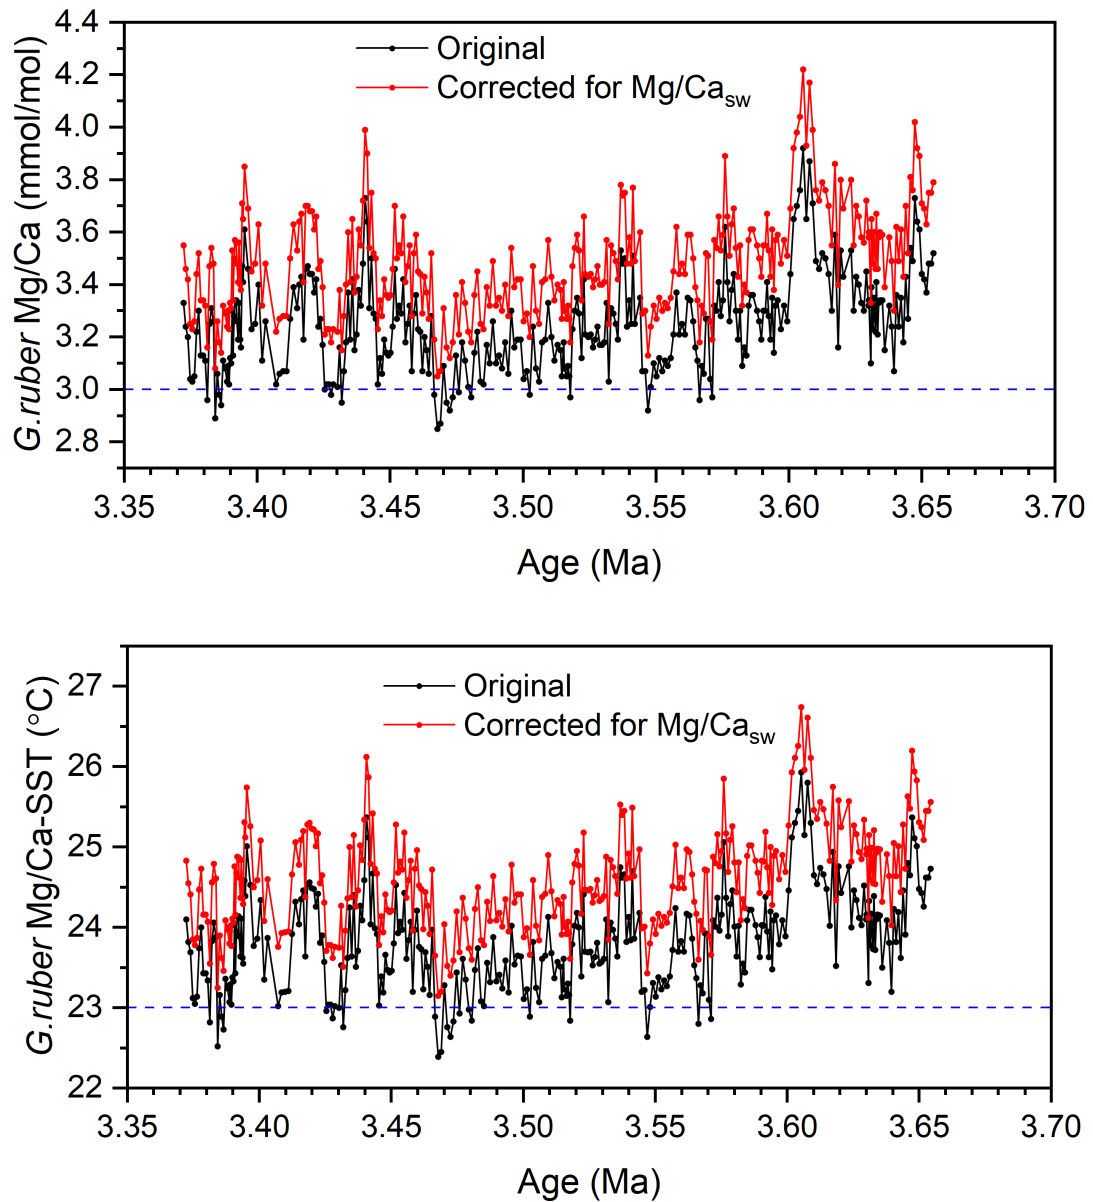

**Figure S3.** The upper panel displays the comparison between original *G. ruber* Mg/Ca ratios (black) and the Mg/Ca ratios (red) corrected for the secular changes in the seawater of Mg/Ca ( $Mg/Ca_{sw}$ ), dashed line indicate the core top *G. ruber* Mg/Ca ratios from nearby core SU90-03. The lower panel shows the corresponding Mg/Ca-based SST records derived from the both original and corrected Mg/Ca ratios. The dashed line represents the modern summer SST of 23 °C at Site U1313.
